# Supplementary material for: Real-Time Monitoring of the Effect of Tumour-Treating Fields on Cell Division Using Live-Cell Imaging
Source: Cells. 2022 Aug 31;11(17):2712. doi: 10.3390/cells11172712 (PMC9454843; doi:10.3390/cells11172712)
Supplement: Supplementary file 1 [file cells-11-02712-s001.zip]

Archive with 6 entries (6 files):
- SuppMat.pdf
- Video S1 í¬ Control HeLa Cells Mitosis 1.m4v
- Video S2 í¬ Control HeLa Cells Mitosis 2.m4v
- Video S3 í¬ TTFields-Exposed HeLa Cells Mitosis 1.m4v
- Video S4 í¬ TTFields-Exposed HeLa Cells Mitosis 2.m4v
- Video S5 í¬ TTFields-Exposed HeLa Cells Mitosis 3.m4v
